# Supplementary material for: Genetic Determinants of Crop Timing and Quality Traits in Two Interspecific Petunia Recombinant Inbred Line Populations
Source: PubMed Central journal article supplement (PMC5466624; doi:10.1038/s41598-017-03528-9), 2017-06-09
Supplement: 41598_2017_3528_MOESM1_ESM.pdf [file 41598_2017_3528_MOESM1_ESM.pdf]

# Genetic Determinants of Crop Timing and Quality Traits in Two Interspecific *Petunia* Recombinant Inbred

## Line populations

Yufang Guo, Wei-Kuang Lin, QiuXia Chen, Veronica A. Vallejo and Ryan M. Warner<sup>1</sup>

Department of Horticulture, Michigan State University, East Lansing, MI 48824

<sup>1</sup> Corresponding author: warnerry@msu.edu

## Supplementary Information

### Supplementary Methods

Table S1. Descriptive statistics for traits analyzed in the *P. axillaris* × *P. exserta* (AE) RIL population and their parents.

Table S2. Descriptive statistics for traits analyzed in the *P. integrifolia* × *P. axillaris* (IA) RIL population and their parents.

Table S3. Coefficient of correlation among traits for the *P. axillaris* × *P. exserta* (AE) RIL population.

Table S4. Coefficient of correlation among traits for the *P. integrifolia* × *P. axillaris* (IA) RIL population.

Table S5. Bin-based genetic linkage maps for the AE and IA populations.

Table S6. List of SNPs within each bin for the AE and IA populations, with SNPs presented by *Petunia axillaris* genome scaffold name and the physical location on scaffold.

Table S7. Corresponding bin markers between the AE and IA linkage maps. The corresponding bins were calculated based on SNPs from the two linkage maps within a bin at the same physical location, within 100 bp, or within 30,000 bp on the same scaffold.

Table S8. Summary of QTL identified for crop timing and quality traits for two interspecific *Petunia* RIL populations, *P. axillaris* × *P. exserta* (AE) and *P. integrifolia* × *P. axillaris* (IA).

Table S9. Summary of QTL for traits unique to the *P. integrifolia* × *P. axillaris* (IA) population.

Table S10. Summary of QTL-rich regions in each population.

Table S11. Comparison of corresponding QTL across the two populations. For each hypothetical pair of corresponding (same) QTL, the location on one population was projected to the other population based on the SNPs within the QTL.

Table S12. Differentially expressed transcripts between shoot apex tissues of fast- and slow-developing IA RILs. The genetic location of DEGs on the IA linkage map was determined by identifying a mapped SNP within 1,000,000 bp of the DEG on the *P. axillaris* genome sequence.

Figure S1. Heat map generated from top 50 differentially expressed genes from apical meristem transcriptome data from the fast and slow lines in the IA RIL population.

## Supplementary Methods

### Quantitative genetic analyses

For each trait, total phenotypic variance was partitioned into sources attributable to genotype ( $V_G$ ) and error ( $V_E$ ) according to Keurentjes et al. <sup>1</sup>. Briefly, the random-effects model  $y = \mu + G + E$  was used. The broad sense heritability ( $H^2$ ) for the RIL population was estimated according to the formula  $H^2 = \delta_g^2 / (\delta_g^2 + \delta_e^2)$ , where  $\delta_g^2$  ( $V_G$ ) is the between genotype variance component and  $\delta_e^2$  ( $V_E$ ) is the residual variance. The coefficient of genetic variation  $CV_g$  was estimated as  $CV_g = (100 \times \sqrt{V_G}) / \bar{X}$ , where  $\bar{X}$  is the trait mean. Analysis of variance (for the RIL population), Pearson correlation coefficients (for traits correlation), and independent samples t-test (to compare parental means) were calculated by using IBM SPSS Statistics 22 (Armonk, NY: IBM Corp).

### Genotyping and linkage map construction

Sequencing was performed at four HiSeq Single-End Lanes on a Genome Analyzer 2000 (2000, Inc, San Diego, CA). The reference genome was from a *P. axillaris* genotype 1.26 Gb in size and consists of 83,639 scaffolds<sup>2</sup>. The quality trimmed reads were mapped to the reference genome using GSNAP<sup>3</sup>. Only unique alignments were used for SNP calling. Both homozygous and heterozygous SNPs were called with PHRED quality  $\geq 20$  ( $\leq 1\%$  error rate) with at least five reads under the SNP loci; while the first and last three base pairs of each read were ignored. The SNPs with an allele frequency  $\geq 0.8$  were called as homozygous. Heterozygous SNPs were called when each allele had an allele frequency  $\geq 0.3$ , and the overall allele frequency was  $\geq 0.8$ . The SNPs were transformed into genotyping data based on the following criteria: for the homozygous call, major alleles had at least five reads with allele frequency of  $\geq 0.9$ , for the

heterozygous call, each allele had at least two reads with allele frequency  $\geq 0.2$ , and the sum of the two alleles had at least five reads and a combined allele frequency of  $\geq 0.9$ . The putative SNPs were then filtered with the following criteria: missing data rate  $\leq 80\%$ , each locus had only two alleles and at least two genotypes with minor allele frequency (MAF)  $\geq 0.1$ . With the filtered SNPs, individual RIL were removed based on the percentage of missing data ( $\geq 90\%$  of SNPs with no genotype calls) and the heterozygous rate (heterozygous SNP site  $>25\%$  for the AE population and  $>30\%$  for the IA population). Subsequent SNP filtering was performed to filter samples in the RIL population for overall missing data rate  $\leq 50\%$ , and with only two alleles for at least two genotypes, the samples should have heterozygosity limited to 0 to 10% and MAF  $\geq 0.1$ . The filtered SNPs and RILs were used for a draft genetic linkage map by R/qtl<sup>4</sup>. For the AE population, the parameters for linkage mapping were: maximum estimated recombination fraction (rf) of 0.25, LOD (logarithm of odds) score  $\geq 16$ , and at least 100 SNPs per linkage group. A higher percentage of heterozygosity existed for the IA population, therefore, the parameters for IA population linkage map construction were: maximum estimated recombination fraction (rf) of 0.1, LOD score  $\geq 30$  and at least 20 SNPs per linkage group. The more relaxed parameters for the IA population enabled more markers to be placed onto the map and minimized the number of linkage groups.

- 1 Keurentjes, J. J. *et al.* Development of a near-isogenic line population of *Arabidopsis thaliana* and comparison of mapping power with a recombinant inbred line population. *Genetics* **175**, 891-905, doi:10.1534/genetics.106.066423 (2007).
- 2 Bombarely, A. *et al.* Insight into the evolution of the Solanaceae from the parental genomes of *Petunia hybrida*. *Nature Plants* **Article Number: 16074** (2016).
- 3 Wu, T. & Nacu, S. Fast and SNP-tolerant detection of complex variants and splicing in short reads. *Bioinformatics* **26**, 873-881 (2010).
- 4 Broman, K., Wu, H., Sen, S. & Churchill, G. R/qtl: QTL mapping in experimental crosses. *Bioinformatics* **19**, 889-890 (2003).

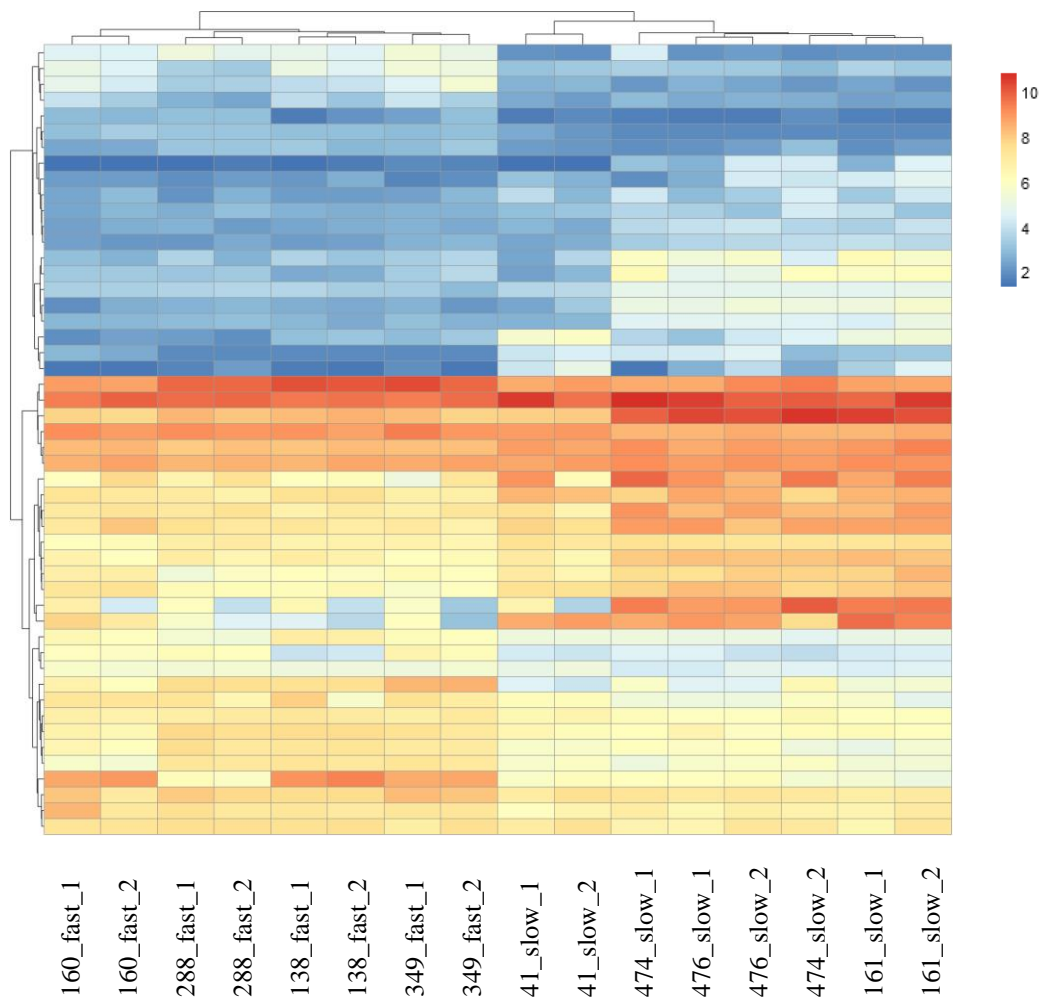

**Supplementary Figure S1.** Heat map generated from top 50 differentially expressed genes from apical meristem transcriptome data from the fast and slow lines in the IA RIL population.

**Supplementary Table S1.** Descriptive statistics for traits analyzed in the *P. axillaris* × *P. exserta* (AE) RIL population and their parents.

| Trait                               | Parent              | Temp | $\bar{x} \pm (\text{SD})$ | Range          | $\bar{x} \pm (\text{SD})$ | Range         | [V <sub>G</sub> ] | [V <sub>E</sub> ] | [H <sup>2</sup> ] | [CV <sub>G</sub> ] | Skewness | Kurtosis |                                     |                     |    |              |               |              |               |         |         |      |        |        |       |                     |   |              |               |                                     |                     |   |              |               |              |               |         |         |      |        |        |       |                     |   |              |               |                |                     |   |              |               |              |               |         |         |      |        |        |       |                     |   |              |               |                |                     |   |              |               |              |               |         |         |      |        |        |       |                     |   |              |               |                |                     |   |              |               |              |               |         |         |      |        |        |       |                     |   |              |               |                |                     |   |              |             |              |               |        |        |      |       |       |       |                     |   |              |               |               |                     |   |             |             |              |               |        |        |      |       |       |      |                     |   |              |               |              |                     |   |             |             |             |             |       |       |      |       |       |      |                     |   |            |             |       |                     |   |           |           |           |           |       |       |      |       |       |      |                     |   |           |           |       |                     |   |           |           |           |           |       |       |     |       |       |      |                     |   |           |           |       |                    |   |           |
|-------------------------------------|---------------------|------|---------------------------|----------------|---------------------------|---------------|-------------------|-------------------|-------------------|--------------------|----------|----------|-------------------------------------|---------------------|----|--------------|---------------|--------------|---------------|---------|---------|------|--------|--------|-------|---------------------|---|--------------|---------------|-------------------------------------|---------------------|---|--------------|---------------|--------------|---------------|---------|---------|------|--------|--------|-------|---------------------|---|--------------|---------------|----------------|---------------------|---|--------------|---------------|--------------|---------------|---------|---------|------|--------|--------|-------|---------------------|---|--------------|---------------|----------------|---------------------|---|--------------|---------------|--------------|---------------|---------|---------|------|--------|--------|-------|---------------------|---|--------------|---------------|----------------|---------------------|---|--------------|---------------|--------------|---------------|---------|---------|------|--------|--------|-------|---------------------|---|--------------|---------------|----------------|---------------------|---|--------------|-------------|--------------|---------------|--------|--------|------|-------|-------|-------|---------------------|---|--------------|---------------|---------------|---------------------|---|-------------|-------------|--------------|---------------|--------|--------|------|-------|-------|------|---------------------|---|--------------|---------------|--------------|---------------------|---|-------------|-------------|-------------|-------------|-------|-------|------|-------|-------|------|---------------------|---|------------|-------------|-------|---------------------|---|-----------|-----------|-----------|-----------|-------|-------|------|-------|-------|------|---------------------|---|-----------|-----------|-------|---------------------|---|-----------|-----------|-----------|-----------|-------|-------|-----|-------|-------|------|---------------------|---|-----------|-----------|-------|--------------------|---|-----------|
|                                     |                     |      | Parents                   | RIL population |                           |               |                   |                   |                   |                    |          |          |                                     |                     |    |              |               |              |               |         |         |      |        |        |       |                     |   |              |               |                                     |                     |   |              |               |              |               |         |         |      |        |        |       |                     |   |              |               |                |                     |   |              |               |              |               |         |         |      |        |        |       |                     |   |              |               |                |                     |   |              |               |              |               |         |         |      |        |        |       |                     |   |              |               |                |                     |   |              |               |              |               |         |         |      |        |        |       |                     |   |              |               |                |                     |   |              |             |              |               |        |        |      |       |       |       |                     |   |              |               |               |                     |   |             |             |              |               |        |        |      |       |       |      |                     |   |              |               |              |                     |   |             |             |             |             |       |       |      |       |       |      |                     |   |            |             |       |                     |   |           |           |           |           |       |       |      |       |       |      |                     |   |           |           |       |                     |   |           |           |           |           |       |       |     |       |       |      |                     |   |           |           |       |                    |   |           |
| Drate<br>(nodes day <sup>-1</sup> ) | PA (Interval_1_14)  | 14   | 0.38±0.08                 | 0.29-0.43      | 0.31±0.07                 | 0.07-0.50     | 0.002             | 0.003             | 0.4               | 14.43              | -0.40    | 1.30     |                                     |                     |    |              |               |              |               |         |         |      |        |        |       |                     |   |              |               |                                     |                     |   |              |               |              |               |         |         |      |        |        |       |                     |   |              |               |                |                     |   |              |               |              |               |         |         |      |        |        |       |                     |   |              |               |                |                     |   |              |               |              |               |         |         |      |        |        |       |                     |   |              |               |                |                     |   |              |               |              |               |         |         |      |        |        |       |                     |   |              |               |                |                     |   |              |             |              |               |        |        |      |       |       |       |                     |   |              |               |               |                     |   |             |             |              |               |        |        |      |       |       |      |                     |   |              |               |              |                     |   |             |             |             |             |       |       |      |       |       |      |                     |   |            |             |       |                     |   |           |           |           |           |       |       |      |       |       |      |                     |   |           |           |       |                     |   |           |           |           |           |       |       |     |       |       |      |                     |   |           |           |       |                    |   |           |
|                                     | PE (Interval_1_14)  | 14   | 0.36±0.07                 | 0.29-0.43      |                           |               |                   |                   |                   |                    |          |          | Drate<br>(nodes day <sup>-1</sup> ) | PA (Interval_14_28) | 14 | 0.48±0.08    | 0.43-0.57     | 0.38±0.07    | 0.21-0.57     | 0.001   | 0.004   | 0.2  | 8.32   | 0.40   | 0.40  | PE (Interval_14_28) | 4 | 0.33±0.08    | 0.29-0.43     | Drate<br>(nodes day <sup>-1</sup> ) | PA (Interval_1_28)  | 4 | 0.43±0.07    | 0.36-0.50     | 0.34±0.06    | 0.14-0.54     | 0.001   | 0.002   | 0.33 | 9.30   | -0.10  | 1.00  | PE (Interval_1_28)  | 4 | 0.35±0.07    | 0.29-0.43     | Nodes          | PA                  | 4 | 28.33±1.53*  | 27.00-30.00   | 17.64±2.39   | 11.00-27.00   | 4.57    | 1.16    | 0.80 | 12.12  | 0.78   | 0.22  | PE                  | 4 | 16.33±0.58   | 16.00-17.00   | DTA            | PA                  | 4 | 70.00±4.58*  | 65.00-74.00   | 62.68±8.11   | 46.00-93.00   | 18.42   | 47.38   | 0.28 | 6.85   | 0.89   | 1.20  | PE                  | 4 | 56.33±6.43   | 49.00-61.00   | HghtFI<br>(mm) | PA                  | 4 | 218.30±36.20 | 195.00-260.00 | 213.80±2.8   | 70.00-490.00  | 2650.00 | 130.8.0 | 0.67 | 24.080 | 0.4.80 | 0.350 | PE                  | 4 | 170.00±10.00 | 160.00-180.00 | FIDiam<br>(mm) | PA                  | 4 | 55.00±0.00** | 55.00-55.00 | 53.80±6.50   | 35.00-75.00   | 22.00  | 20.00  | 0.52 | 8.72  | 0.10  | -0.29 | PE                  | 4 | 50.00±0.00   | 50.00-50.00   | LLeng<br>(mm) | PA                  | 4 | 56.70±10.40 | 45.00-65.00 | 106.80±20.70 | 60.00-1410.00 | 218.30 | 210.50 | 0.51 | 13.83 | 0.42  | 0.24 | PE                  | 4 | 113.30±15.30 | 100.00-130.00 | LWid<br>(mm) | PA                  | 4 | 28.30±7.60* | 20.00-35.00 | 50.00±10.80 | 15.00-90.00 | 63.00 | 53.00 | 0.54 | 15.88 | 0.3   | 0.08 | PE                  | 4 | 60.00±5.00 | 55.00-65.00 | Drate | PA (Interval_1_14)  | 7 | 0.48±0.04 | 0.43-0.50 | 0.40±0.06 | 0.21-0.79 | 0.001 | 0.003 | 0.25 | 7.91  | 0.75  | 3.12 | PE (Interval_1_14)  | 7 | 0.45±0.04 | 0.43-0.50 | DRate | PA (Interval_14_28) | 7 | 0.64±0.07 | 0.57-0.71 | 0.54±0.08 | 0.14-0.79 | 0.003 | 0.003 | 0.5 | 10.14 | -0.16 | 1.84 | PE (Interval_14_28) | 7 | 0.50±0.00 | 0.50-0.50 | DRate | PA (Interval_1_28) | 7 | 0.56±0.05 |
| Drate<br>(nodes day <sup>-1</sup> ) | PA (Interval_14_28) | 14   | 0.48±0.08                 | 0.43-0.57      | 0.38±0.07                 | 0.21-0.57     | 0.001             | 0.004             | 0.2               | 8.32               | 0.40     | 0.40     |                                     |                     |    |              |               |              |               |         |         |      |        |        |       |                     |   |              |               |                                     |                     |   |              |               |              |               |         |         |      |        |        |       |                     |   |              |               |                |                     |   |              |               |              |               |         |         |      |        |        |       |                     |   |              |               |                |                     |   |              |               |              |               |         |         |      |        |        |       |                     |   |              |               |                |                     |   |              |               |              |               |         |         |      |        |        |       |                     |   |              |               |                |                     |   |              |             |              |               |        |        |      |       |       |       |                     |   |              |               |               |                     |   |             |             |              |               |        |        |      |       |       |      |                     |   |              |               |              |                     |   |             |             |             |             |       |       |      |       |       |      |                     |   |            |             |       |                     |   |           |           |           |           |       |       |      |       |       |      |                     |   |           |           |       |                     |   |           |           |           |           |       |       |     |       |       |      |                     |   |           |           |       |                    |   |           |
|                                     | PE (Interval_14_28) | 4    | 0.33±0.08                 | 0.29-0.43      |                           |               |                   |                   |                   |                    |          |          | Drate<br>(nodes day <sup>-1</sup> ) | PA (Interval_1_28)  | 4  | 0.43±0.07    | 0.36-0.50     | 0.34±0.06    | 0.14-0.54     | 0.001   | 0.002   | 0.33 | 9.30   | -0.10  | 1.00  | PE (Interval_1_28)  | 4 | 0.35±0.07    | 0.29-0.43     | Nodes                               | PA                  | 4 | 28.33±1.53*  | 27.00-30.00   | 17.64±2.39   | 11.00-27.00   | 4.57    | 1.16    | 0.80 | 12.12  | 0.78   | 0.22  | PE                  | 4 | 16.33±0.58   | 16.00-17.00   | DTA            | PA                  | 4 | 70.00±4.58*  | 65.00-74.00   | 62.68±8.11   | 46.00-93.00   | 18.42   | 47.38   | 0.28 | 6.85   | 0.89   | 1.20  | PE                  | 4 | 56.33±6.43   | 49.00-61.00   | HghtFI<br>(mm) | PA                  | 4 | 218.30±36.20 | 195.00-260.00 | 213.80±2.8   | 70.00-490.00  | 2650.00 | 130.8.0 | 0.67 | 24.080 | 0.4.80 | 0.350 | PE                  | 4 | 170.00±10.00 | 160.00-180.00 | FIDiam<br>(mm) | PA                  | 4 | 55.00±0.00** | 55.00-55.00   | 53.80±6.50   | 35.00-75.00   | 22.00   | 20.00   | 0.52 | 8.72   | 0.10   | -0.29 | PE                  | 4 | 50.00±0.00   | 50.00-50.00   | LLeng<br>(mm)  | PA                  | 4 | 56.70±10.40  | 45.00-65.00 | 106.80±20.70 | 60.00-1410.00 | 218.30 | 210.50 | 0.51 | 13.83 | 0.42  | 0.24  | PE                  | 4 | 113.30±15.30 | 100.00-130.00 | LWid<br>(mm)  | PA                  | 4 | 28.30±7.60* | 20.00-35.00 | 50.00±10.80  | 15.00-90.00   | 63.00  | 53.00  | 0.54 | 15.88 | 0.3   | 0.08 | PE                  | 4 | 60.00±5.00   | 55.00-65.00   | Drate        | PA (Interval_1_14)  | 7 | 0.48±0.04   | 0.43-0.50   | 0.40±0.06   | 0.21-0.79   | 0.001 | 0.003 | 0.25 | 7.91  | 0.75  | 3.12 | PE (Interval_1_14)  | 7 | 0.45±0.04  | 0.43-0.50   | DRate | PA (Interval_14_28) | 7 | 0.64±0.07 | 0.57-0.71 | 0.54±0.08 | 0.14-0.79 | 0.003 | 0.003 | 0.5  | 10.14 | -0.16 | 1.84 | PE (Interval_14_28) | 7 | 0.50±0.00 | 0.50-0.50 | DRate | PA (Interval_1_28)  | 7 | 0.56±0.05 | 0.50-0.61 | 0.47±0.06 | 0.25-0.64 | 0.002 | 0.002 | 0.5 | 9.52  | 0.15  | 0.78 |                     |   |           |           |       |                    |   |           |
| Drate<br>(nodes day <sup>-1</sup> ) | PA (Interval_1_28)  | 4    | 0.43±0.07                 | 0.36-0.50      | 0.34±0.06                 | 0.14-0.54     | 0.001             | 0.002             | 0.33              | 9.30               | -0.10    | 1.00     |                                     |                     |    |              |               |              |               |         |         |      |        |        |       |                     |   |              |               |                                     |                     |   |              |               |              |               |         |         |      |        |        |       |                     |   |              |               |                |                     |   |              |               |              |               |         |         |      |        |        |       |                     |   |              |               |                |                     |   |              |               |              |               |         |         |      |        |        |       |                     |   |              |               |                |                     |   |              |               |              |               |         |         |      |        |        |       |                     |   |              |               |                |                     |   |              |             |              |               |        |        |      |       |       |       |                     |   |              |               |               |                     |   |             |             |              |               |        |        |      |       |       |      |                     |   |              |               |              |                     |   |             |             |             |             |       |       |      |       |       |      |                     |   |            |             |       |                     |   |           |           |           |           |       |       |      |       |       |      |                     |   |           |           |       |                     |   |           |           |           |           |       |       |     |       |       |      |                     |   |           |           |       |                    |   |           |
|                                     | PE (Interval_1_28)  | 4    | 0.35±0.07                 | 0.29-0.43      |                           |               |                   |                   |                   |                    |          |          | Nodes                               | PA                  | 4  | 28.33±1.53*  | 27.00-30.00   | 17.64±2.39   | 11.00-27.00   | 4.57    | 1.16    | 0.80 | 12.12  | 0.78   | 0.22  | PE                  | 4 | 16.33±0.58   | 16.00-17.00   | DTA                                 | PA                  | 4 | 70.00±4.58*  | 65.00-74.00   | 62.68±8.11   | 46.00-93.00   | 18.42   | 47.38   | 0.28 | 6.85   | 0.89   | 1.20  | PE                  | 4 | 56.33±6.43   | 49.00-61.00   | HghtFI<br>(mm) | PA                  | 4 | 218.30±36.20 | 195.00-260.00 | 213.80±2.8   | 70.00-490.00  | 2650.00 | 130.8.0 | 0.67 | 24.080 | 0.4.80 | 0.350 | PE                  | 4 | 170.00±10.00 | 160.00-180.00 | FIDiam<br>(mm) | PA                  | 4 | 55.00±0.00** | 55.00-55.00   | 53.80±6.50   | 35.00-75.00   | 22.00   | 20.00   | 0.52 | 8.72   | 0.10   | -0.29 | PE                  | 4 | 50.00±0.00   | 50.00-50.00   | LLeng<br>(mm)  | PA                  | 4 | 56.70±10.40  | 45.00-65.00   | 106.80±20.70 | 60.00-1410.00 | 218.30  | 210.50  | 0.51 | 13.83  | 0.42   | 0.24  | PE                  | 4 | 113.30±15.30 | 100.00-130.00 | LWid<br>(mm)   | PA                  | 4 | 28.30±7.60*  | 20.00-35.00 | 50.00±10.80  | 15.00-90.00   | 63.00  | 53.00  | 0.54 | 15.88 | 0.3   | 0.08  | PE                  | 4 | 60.00±5.00   | 55.00-65.00   | Drate         | PA (Interval_1_14)  | 7 | 0.48±0.04   | 0.43-0.50   | 0.40±0.06    | 0.21-0.79     | 0.001  | 0.003  | 0.25 | 7.91  | 0.75  | 3.12 | PE (Interval_1_14)  | 7 | 0.45±0.04    | 0.43-0.50     | DRate        | PA (Interval_14_28) | 7 | 0.64±0.07   | 0.57-0.71   | 0.54±0.08   | 0.14-0.79   | 0.003 | 0.003 | 0.5  | 10.14 | -0.16 | 1.84 | PE (Interval_14_28) | 7 | 0.50±0.00  | 0.50-0.50   | DRate | PA (Interval_1_28)  | 7 | 0.56±0.05 | 0.50-0.61 | 0.47±0.06 | 0.25-0.64 | 0.002 | 0.002 | 0.5  | 9.52  | 0.15  | 0.78 |                     |   |           |           |       |                     |   |           |           |           |           |       |       |     |       |       |      |                     |   |           |           |       |                    |   |           |
| Nodes                               | PA                  | 4    | 28.33±1.53*               | 27.00-30.00    | 17.64±2.39                | 11.00-27.00   | 4.57              | 1.16              | 0.80              | 12.12              | 0.78     | 0.22     |                                     |                     |    |              |               |              |               |         |         |      |        |        |       |                     |   |              |               |                                     |                     |   |              |               |              |               |         |         |      |        |        |       |                     |   |              |               |                |                     |   |              |               |              |               |         |         |      |        |        |       |                     |   |              |               |                |                     |   |              |               |              |               |         |         |      |        |        |       |                     |   |              |               |                |                     |   |              |               |              |               |         |         |      |        |        |       |                     |   |              |               |                |                     |   |              |             |              |               |        |        |      |       |       |       |                     |   |              |               |               |                     |   |             |             |              |               |        |        |      |       |       |      |                     |   |              |               |              |                     |   |             |             |             |             |       |       |      |       |       |      |                     |   |            |             |       |                     |   |           |           |           |           |       |       |      |       |       |      |                     |   |           |           |       |                     |   |           |           |           |           |       |       |     |       |       |      |                     |   |           |           |       |                    |   |           |
|                                     | PE                  | 4    | 16.33±0.58                | 16.00-17.00    |                           |               |                   |                   |                   |                    |          |          | DTA                                 | PA                  | 4  | 70.00±4.58*  | 65.00-74.00   | 62.68±8.11   | 46.00-93.00   | 18.42   | 47.38   | 0.28 | 6.85   | 0.89   | 1.20  | PE                  | 4 | 56.33±6.43   | 49.00-61.00   | HghtFI<br>(mm)                      | PA                  | 4 | 218.30±36.20 | 195.00-260.00 | 213.80±2.8   | 70.00-490.00  | 2650.00 | 130.8.0 | 0.67 | 24.080 | 0.4.80 | 0.350 | PE                  | 4 | 170.00±10.00 | 160.00-180.00 | FIDiam<br>(mm) | PA                  | 4 | 55.00±0.00** | 55.00-55.00   | 53.80±6.50   | 35.00-75.00   | 22.00   | 20.00   | 0.52 | 8.72   | 0.10   | -0.29 | PE                  | 4 | 50.00±0.00   | 50.00-50.00   | LLeng<br>(mm)  | PA                  | 4 | 56.70±10.40  | 45.00-65.00   | 106.80±20.70 | 60.00-1410.00 | 218.30  | 210.50  | 0.51 | 13.83  | 0.42   | 0.24  | PE                  | 4 | 113.30±15.30 | 100.00-130.00 | LWid<br>(mm)   | PA                  | 4 | 28.30±7.60*  | 20.00-35.00   | 50.00±10.80  | 15.00-90.00   | 63.00   | 53.00   | 0.54 | 15.88  | 0.3    | 0.08  | PE                  | 4 | 60.00±5.00   | 55.00-65.00   | Drate          | PA (Interval_1_14)  | 7 | 0.48±0.04    | 0.43-0.50   | 0.40±0.06    | 0.21-0.79     | 0.001  | 0.003  | 0.25 | 7.91  | 0.75  | 3.12  | PE (Interval_1_14)  | 7 | 0.45±0.04    | 0.43-0.50     | DRate         | PA (Interval_14_28) | 7 | 0.64±0.07   | 0.57-0.71   | 0.54±0.08    | 0.14-0.79     | 0.003  | 0.003  | 0.5  | 10.14 | -0.16 | 1.84 | PE (Interval_14_28) | 7 | 0.50±0.00    | 0.50-0.50     | DRate        | PA (Interval_1_28)  | 7 | 0.56±0.05   | 0.50-0.61   | 0.47±0.06   | 0.25-0.64   | 0.002 | 0.002 | 0.5  | 9.52  | 0.15  | 0.78 |                     |   |            |             |       |                     |   |           |           |           |           |       |       |      |       |       |      |                     |   |           |           |       |                     |   |           |           |           |           |       |       |     |       |       |      |                     |   |           |           |       |                    |   |           |
| DTA                                 | PA                  | 4    | 70.00±4.58*               | 65.00-74.00    | 62.68±8.11                | 46.00-93.00   | 18.42             | 47.38             | 0.28              | 6.85               | 0.89     | 1.20     |                                     |                     |    |              |               |              |               |         |         |      |        |        |       |                     |   |              |               |                                     |                     |   |              |               |              |               |         |         |      |        |        |       |                     |   |              |               |                |                     |   |              |               |              |               |         |         |      |        |        |       |                     |   |              |               |                |                     |   |              |               |              |               |         |         |      |        |        |       |                     |   |              |               |                |                     |   |              |               |              |               |         |         |      |        |        |       |                     |   |              |               |                |                     |   |              |             |              |               |        |        |      |       |       |       |                     |   |              |               |               |                     |   |             |             |              |               |        |        |      |       |       |      |                     |   |              |               |              |                     |   |             |             |             |             |       |       |      |       |       |      |                     |   |            |             |       |                     |   |           |           |           |           |       |       |      |       |       |      |                     |   |           |           |       |                     |   |           |           |           |           |       |       |     |       |       |      |                     |   |           |           |       |                    |   |           |
|                                     | PE                  | 4    | 56.33±6.43                | 49.00-61.00    |                           |               |                   |                   |                   |                    |          |          | HghtFI<br>(mm)                      | PA                  | 4  | 218.30±36.20 | 195.00-260.00 | 213.80±2.8   | 70.00-490.00  | 2650.00 | 130.8.0 | 0.67 | 24.080 | 0.4.80 | 0.350 | PE                  | 4 | 170.00±10.00 | 160.00-180.00 | FIDiam<br>(mm)                      | PA                  | 4 | 55.00±0.00** | 55.00-55.00   | 53.80±6.50   | 35.00-75.00   | 22.00   | 20.00   | 0.52 | 8.72   | 0.10   | -0.29 | PE                  | 4 | 50.00±0.00   | 50.00-50.00   | LLeng<br>(mm)  | PA                  | 4 | 56.70±10.40  | 45.00-65.00   | 106.80±20.70 | 60.00-1410.00 | 218.30  | 210.50  | 0.51 | 13.83  | 0.42   | 0.24  | PE                  | 4 | 113.30±15.30 | 100.00-130.00 | LWid<br>(mm)   | PA                  | 4 | 28.30±7.60*  | 20.00-35.00   | 50.00±10.80  | 15.00-90.00   | 63.00   | 53.00   | 0.54 | 15.88  | 0.3    | 0.08  | PE                  | 4 | 60.00±5.00   | 55.00-65.00   | Drate          | PA (Interval_1_14)  | 7 | 0.48±0.04    | 0.43-0.50     | 0.40±0.06    | 0.21-0.79     | 0.001   | 0.003   | 0.25 | 7.91   | 0.75   | 3.12  | PE (Interval_1_14)  | 7 | 0.45±0.04    | 0.43-0.50     | DRate          | PA (Interval_14_28) | 7 | 0.64±0.07    | 0.57-0.71   | 0.54±0.08    | 0.14-0.79     | 0.003  | 0.003  | 0.5  | 10.14 | -0.16 | 1.84  | PE (Interval_14_28) | 7 | 0.50±0.00    | 0.50-0.50     | DRate         | PA (Interval_1_28)  | 7 | 0.56±0.05   | 0.50-0.61   | 0.47±0.06    | 0.25-0.64     | 0.002  | 0.002  | 0.5  | 9.52  | 0.15  | 0.78 |                     |   |              |               |              |                     |   |             |             |             |             |       |       |      |       |       |      |                     |   |            |             |       |                     |   |           |           |           |           |       |       |      |       |       |      |                     |   |           |           |       |                     |   |           |           |           |           |       |       |     |       |       |      |                     |   |           |           |       |                    |   |           |
| HghtFI<br>(mm)                      | PA                  | 4    | 218.30±36.20              | 195.00-260.00  | 213.80±2.8                | 70.00-490.00  | 2650.00           | 130.8.0           | 0.67              | 24.080             | 0.4.80   | 0.350    |                                     |                     |    |              |               |              |               |         |         |      |        |        |       |                     |   |              |               |                                     |                     |   |              |               |              |               |         |         |      |        |        |       |                     |   |              |               |                |                     |   |              |               |              |               |         |         |      |        |        |       |                     |   |              |               |                |                     |   |              |               |              |               |         |         |      |        |        |       |                     |   |              |               |                |                     |   |              |               |              |               |         |         |      |        |        |       |                     |   |              |               |                |                     |   |              |             |              |               |        |        |      |       |       |       |                     |   |              |               |               |                     |   |             |             |              |               |        |        |      |       |       |      |                     |   |              |               |              |                     |   |             |             |             |             |       |       |      |       |       |      |                     |   |            |             |       |                     |   |           |           |           |           |       |       |      |       |       |      |                     |   |           |           |       |                     |   |           |           |           |           |       |       |     |       |       |      |                     |   |           |           |       |                    |   |           |
|                                     | PE                  | 4    | 170.00±10.00              | 160.00-180.00  |                           |               |                   |                   |                   |                    |          |          | FIDiam<br>(mm)                      | PA                  | 4  | 55.00±0.00** | 55.00-55.00   | 53.80±6.50   | 35.00-75.00   | 22.00   | 20.00   | 0.52 | 8.72   | 0.10   | -0.29 | PE                  | 4 | 50.00±0.00   | 50.00-50.00   | LLeng<br>(mm)                       | PA                  | 4 | 56.70±10.40  | 45.00-65.00   | 106.80±20.70 | 60.00-1410.00 | 218.30  | 210.50  | 0.51 | 13.83  | 0.42   | 0.24  | PE                  | 4 | 113.30±15.30 | 100.00-130.00 | LWid<br>(mm)   | PA                  | 4 | 28.30±7.60*  | 20.00-35.00   | 50.00±10.80  | 15.00-90.00   | 63.00   | 53.00   | 0.54 | 15.88  | 0.3    | 0.08  | PE                  | 4 | 60.00±5.00   | 55.00-65.00   | Drate          | PA (Interval_1_14)  | 7 | 0.48±0.04    | 0.43-0.50     | 0.40±0.06    | 0.21-0.79     | 0.001   | 0.003   | 0.25 | 7.91   | 0.75   | 3.12  | PE (Interval_1_14)  | 7 | 0.45±0.04    | 0.43-0.50     | DRate          | PA (Interval_14_28) | 7 | 0.64±0.07    | 0.57-0.71     | 0.54±0.08    | 0.14-0.79     | 0.003   | 0.003   | 0.5  | 10.14  | -0.16  | 1.84  | PE (Interval_14_28) | 7 | 0.50±0.00    | 0.50-0.50     | DRate          | PA (Interval_1_28)  | 7 | 0.56±0.05    | 0.50-0.61   | 0.47±0.06    | 0.25-0.64     | 0.002  | 0.002  | 0.5  | 9.52  | 0.15  | 0.78  |                     |   |              |               |               |                     |   |             |             |              |               |        |        |      |       |       |      |                     |   |              |               |              |                     |   |             |             |             |             |       |       |      |       |       |      |                     |   |            |             |       |                     |   |           |           |           |           |       |       |      |       |       |      |                     |   |           |           |       |                     |   |           |           |           |           |       |       |     |       |       |      |                     |   |           |           |       |                    |   |           |
| FIDiam<br>(mm)                      | PA                  | 4    | 55.00±0.00**              | 55.00-55.00    | 53.80±6.50                | 35.00-75.00   | 22.00             | 20.00             | 0.52              | 8.72               | 0.10     | -0.29    |                                     |                     |    |              |               |              |               |         |         |      |        |        |       |                     |   |              |               |                                     |                     |   |              |               |              |               |         |         |      |        |        |       |                     |   |              |               |                |                     |   |              |               |              |               |         |         |      |        |        |       |                     |   |              |               |                |                     |   |              |               |              |               |         |         |      |        |        |       |                     |   |              |               |                |                     |   |              |               |              |               |         |         |      |        |        |       |                     |   |              |               |                |                     |   |              |             |              |               |        |        |      |       |       |       |                     |   |              |               |               |                     |   |             |             |              |               |        |        |      |       |       |      |                     |   |              |               |              |                     |   |             |             |             |             |       |       |      |       |       |      |                     |   |            |             |       |                     |   |           |           |           |           |       |       |      |       |       |      |                     |   |           |           |       |                     |   |           |           |           |           |       |       |     |       |       |      |                     |   |           |           |       |                    |   |           |
|                                     | PE                  | 4    | 50.00±0.00                | 50.00-50.00    |                           |               |                   |                   |                   |                    |          |          | LLeng<br>(mm)                       | PA                  | 4  | 56.70±10.40  | 45.00-65.00   | 106.80±20.70 | 60.00-1410.00 | 218.30  | 210.50  | 0.51 | 13.83  | 0.42   | 0.24  | PE                  | 4 | 113.30±15.30 | 100.00-130.00 | LWid<br>(mm)                        | PA                  | 4 | 28.30±7.60*  | 20.00-35.00   | 50.00±10.80  | 15.00-90.00   | 63.00   | 53.00   | 0.54 | 15.88  | 0.3    | 0.08  | PE                  | 4 | 60.00±5.00   | 55.00-65.00   | Drate          | PA (Interval_1_14)  | 7 | 0.48±0.04    | 0.43-0.50     | 0.40±0.06    | 0.21-0.79     | 0.001   | 0.003   | 0.25 | 7.91   | 0.75   | 3.12  | PE (Interval_1_14)  | 7 | 0.45±0.04    | 0.43-0.50     | DRate          | PA (Interval_14_28) | 7 | 0.64±0.07    | 0.57-0.71     | 0.54±0.08    | 0.14-0.79     | 0.003   | 0.003   | 0.5  | 10.14  | -0.16  | 1.84  | PE (Interval_14_28) | 7 | 0.50±0.00    | 0.50-0.50     | DRate          | PA (Interval_1_28)  | 7 | 0.56±0.05    | 0.50-0.61     | 0.47±0.06    | 0.25-0.64     | 0.002   | 0.002   | 0.5  | 9.52   | 0.15   | 0.78  |                     |   |              |               |                |                     |   |              |             |              |               |        |        |      |       |       |       |                     |   |              |               |               |                     |   |             |             |              |               |        |        |      |       |       |      |                     |   |              |               |              |                     |   |             |             |             |             |       |       |      |       |       |      |                     |   |            |             |       |                     |   |           |           |           |           |       |       |      |       |       |      |                     |   |           |           |       |                     |   |           |           |           |           |       |       |     |       |       |      |                     |   |           |           |       |                    |   |           |
| LLeng<br>(mm)                       | PA                  | 4    | 56.70±10.40               | 45.00-65.00    | 106.80±20.70              | 60.00-1410.00 | 218.30            | 210.50            | 0.51              | 13.83              | 0.42     | 0.24     |                                     |                     |    |              |               |              |               |         |         |      |        |        |       |                     |   |              |               |                                     |                     |   |              |               |              |               |         |         |      |        |        |       |                     |   |              |               |                |                     |   |              |               |              |               |         |         |      |        |        |       |                     |   |              |               |                |                     |   |              |               |              |               |         |         |      |        |        |       |                     |   |              |               |                |                     |   |              |               |              |               |         |         |      |        |        |       |                     |   |              |               |                |                     |   |              |             |              |               |        |        |      |       |       |       |                     |   |              |               |               |                     |   |             |             |              |               |        |        |      |       |       |      |                     |   |              |               |              |                     |   |             |             |             |             |       |       |      |       |       |      |                     |   |            |             |       |                     |   |           |           |           |           |       |       |      |       |       |      |                     |   |           |           |       |                     |   |           |           |           |           |       |       |     |       |       |      |                     |   |           |           |       |                    |   |           |
|                                     | PE                  | 4    | 113.30±15.30              | 100.00-130.00  |                           |               |                   |                   |                   |                    |          |          | LWid<br>(mm)                        | PA                  | 4  | 28.30±7.60*  | 20.00-35.00   | 50.00±10.80  | 15.00-90.00   | 63.00   | 53.00   | 0.54 | 15.88  | 0.3    | 0.08  | PE                  | 4 | 60.00±5.00   | 55.00-65.00   | Drate                               | PA (Interval_1_14)  | 7 | 0.48±0.04    | 0.43-0.50     | 0.40±0.06    | 0.21-0.79     | 0.001   | 0.003   | 0.25 | 7.91   | 0.75   | 3.12  | PE (Interval_1_14)  | 7 | 0.45±0.04    | 0.43-0.50     | DRate          | PA (Interval_14_28) | 7 | 0.64±0.07    | 0.57-0.71     | 0.54±0.08    | 0.14-0.79     | 0.003   | 0.003   | 0.5  | 10.14  | -0.16  | 1.84  | PE (Interval_14_28) | 7 | 0.50±0.00    | 0.50-0.50     | DRate          | PA (Interval_1_28)  | 7 | 0.56±0.05    | 0.50-0.61     | 0.47±0.06    | 0.25-0.64     | 0.002   | 0.002   | 0.5  | 9.52   | 0.15   | 0.78  |                     |   |              |               |                |                     |   |              |               |              |               |         |         |      |        |        |       |                     |   |              |               |                |                     |   |              |             |              |               |        |        |      |       |       |       |                     |   |              |               |               |                     |   |             |             |              |               |        |        |      |       |       |      |                     |   |              |               |              |                     |   |             |             |             |             |       |       |      |       |       |      |                     |   |            |             |       |                     |   |           |           |           |           |       |       |      |       |       |      |                     |   |           |           |       |                     |   |           |           |           |           |       |       |     |       |       |      |                     |   |           |           |       |                    |   |           |
| LWid<br>(mm)                        | PA                  | 4    | 28.30±7.60*               | 20.00-35.00    | 50.00±10.80               | 15.00-90.00   | 63.00             | 53.00             | 0.54              | 15.88              | 0.3      | 0.08     |                                     |                     |    |              |               |              |               |         |         |      |        |        |       |                     |   |              |               |                                     |                     |   |              |               |              |               |         |         |      |        |        |       |                     |   |              |               |                |                     |   |              |               |              |               |         |         |      |        |        |       |                     |   |              |               |                |                     |   |              |               |              |               |         |         |      |        |        |       |                     |   |              |               |                |                     |   |              |               |              |               |         |         |      |        |        |       |                     |   |              |               |                |                     |   |              |             |              |               |        |        |      |       |       |       |                     |   |              |               |               |                     |   |             |             |              |               |        |        |      |       |       |      |                     |   |              |               |              |                     |   |             |             |             |             |       |       |      |       |       |      |                     |   |            |             |       |                     |   |           |           |           |           |       |       |      |       |       |      |                     |   |           |           |       |                     |   |           |           |           |           |       |       |     |       |       |      |                     |   |           |           |       |                    |   |           |
|                                     | PE                  | 4    | 60.00±5.00                | 55.00-65.00    |                           |               |                   |                   |                   |                    |          |          | Drate                               | PA (Interval_1_14)  | 7  | 0.48±0.04    | 0.43-0.50     | 0.40±0.06    | 0.21-0.79     | 0.001   | 0.003   | 0.25 | 7.91   | 0.75   | 3.12  | PE (Interval_1_14)  | 7 | 0.45±0.04    | 0.43-0.50     | DRate                               | PA (Interval_14_28) | 7 | 0.64±0.07    | 0.57-0.71     | 0.54±0.08    | 0.14-0.79     | 0.003   | 0.003   | 0.5  | 10.14  | -0.16  | 1.84  | PE (Interval_14_28) | 7 | 0.50±0.00    | 0.50-0.50     | DRate          | PA (Interval_1_28)  | 7 | 0.56±0.05    | 0.50-0.61     | 0.47±0.06    | 0.25-0.64     | 0.002   | 0.002   | 0.5  | 9.52   | 0.15   | 0.78  |                     |   |              |               |                |                     |   |              |               |              |               |         |         |      |        |        |       |                     |   |              |               |                |                     |   |              |               |              |               |         |         |      |        |        |       |                     |   |              |               |                |                     |   |              |             |              |               |        |        |      |       |       |       |                     |   |              |               |               |                     |   |             |             |              |               |        |        |      |       |       |      |                     |   |              |               |              |                     |   |             |             |             |             |       |       |      |       |       |      |                     |   |            |             |       |                     |   |           |           |           |           |       |       |      |       |       |      |                     |   |           |           |       |                     |   |           |           |           |           |       |       |     |       |       |      |                     |   |           |           |       |                    |   |           |
| Drate                               | PA (Interval_1_14)  | 7    | 0.48±0.04                 | 0.43-0.50      | 0.40±0.06                 | 0.21-0.79     | 0.001             | 0.003             | 0.25              | 7.91               | 0.75     | 3.12     |                                     |                     |    |              |               |              |               |         |         |      |        |        |       |                     |   |              |               |                                     |                     |   |              |               |              |               |         |         |      |        |        |       |                     |   |              |               |                |                     |   |              |               |              |               |         |         |      |        |        |       |                     |   |              |               |                |                     |   |              |               |              |               |         |         |      |        |        |       |                     |   |              |               |                |                     |   |              |               |              |               |         |         |      |        |        |       |                     |   |              |               |                |                     |   |              |             |              |               |        |        |      |       |       |       |                     |   |              |               |               |                     |   |             |             |              |               |        |        |      |       |       |      |                     |   |              |               |              |                     |   |             |             |             |             |       |       |      |       |       |      |                     |   |            |             |       |                     |   |           |           |           |           |       |       |      |       |       |      |                     |   |           |           |       |                     |   |           |           |           |           |       |       |     |       |       |      |                     |   |           |           |       |                    |   |           |
|                                     | PE (Interval_1_14)  | 7    | 0.45±0.04                 | 0.43-0.50      |                           |               |                   |                   |                   |                    |          |          | DRate                               | PA (Interval_14_28) | 7  | 0.64±0.07    | 0.57-0.71     | 0.54±0.08    | 0.14-0.79     | 0.003   | 0.003   | 0.5  | 10.14  | -0.16  | 1.84  | PE (Interval_14_28) | 7 | 0.50±0.00    | 0.50-0.50     | DRate                               | PA (Interval_1_28)  | 7 | 0.56±0.05    | 0.50-0.61     | 0.47±0.06    | 0.25-0.64     | 0.002   | 0.002   | 0.5  | 9.52   | 0.15   | 0.78  |                     |   |              |               |                |                     |   |              |               |              |               |         |         |      |        |        |       |                     |   |              |               |                |                     |   |              |               |              |               |         |         |      |        |        |       |                     |   |              |               |                |                     |   |              |               |              |               |         |         |      |        |        |       |                     |   |              |               |                |                     |   |              |             |              |               |        |        |      |       |       |       |                     |   |              |               |               |                     |   |             |             |              |               |        |        |      |       |       |      |                     |   |              |               |              |                     |   |             |             |             |             |       |       |      |       |       |      |                     |   |            |             |       |                     |   |           |           |           |           |       |       |      |       |       |      |                     |   |           |           |       |                     |   |           |           |           |           |       |       |     |       |       |      |                     |   |           |           |       |                    |   |           |
| DRate                               | PA (Interval_14_28) | 7    | 0.64±0.07                 | 0.57-0.71      | 0.54±0.08                 | 0.14-0.79     | 0.003             | 0.003             | 0.5               | 10.14              | -0.16    | 1.84     |                                     |                     |    |              |               |              |               |         |         |      |        |        |       |                     |   |              |               |                                     |                     |   |              |               |              |               |         |         |      |        |        |       |                     |   |              |               |                |                     |   |              |               |              |               |         |         |      |        |        |       |                     |   |              |               |                |                     |   |              |               |              |               |         |         |      |        |        |       |                     |   |              |               |                |                     |   |              |               |              |               |         |         |      |        |        |       |                     |   |              |               |                |                     |   |              |             |              |               |        |        |      |       |       |       |                     |   |              |               |               |                     |   |             |             |              |               |        |        |      |       |       |      |                     |   |              |               |              |                     |   |             |             |             |             |       |       |      |       |       |      |                     |   |            |             |       |                     |   |           |           |           |           |       |       |      |       |       |      |                     |   |           |           |       |                     |   |           |           |           |           |       |       |     |       |       |      |                     |   |           |           |       |                    |   |           |
|                                     | PE (Interval_14_28) | 7    | 0.50±0.00                 | 0.50-0.50      |                           |               |                   |                   |                   |                    |          |          | DRate                               | PA (Interval_1_28)  | 7  | 0.56±0.05    | 0.50-0.61     | 0.47±0.06    | 0.25-0.64     | 0.002   | 0.002   | 0.5  | 9.52   | 0.15   | 0.78  |                     |   |              |               |                                     |                     |   |              |               |              |               |         |         |      |        |        |       |                     |   |              |               |                |                     |   |              |               |              |               |         |         |      |        |        |       |                     |   |              |               |                |                     |   |              |               |              |               |         |         |      |        |        |       |                     |   |              |               |                |                     |   |              |               |              |               |         |         |      |        |        |       |                     |   |              |               |                |                     |   |              |             |              |               |        |        |      |       |       |       |                     |   |              |               |               |                     |   |             |             |              |               |        |        |      |       |       |      |                     |   |              |               |              |                     |   |             |             |             |             |       |       |      |       |       |      |                     |   |            |             |       |                     |   |           |           |           |           |       |       |      |       |       |      |                     |   |           |           |       |                     |   |           |           |           |           |       |       |     |       |       |      |                     |   |           |           |       |                    |   |           |
| DRate                               | PA (Interval_1_28)  | 7    | 0.56±0.05                 | 0.50-0.61      | 0.47±0.06                 | 0.25-0.64     | 0.002             | 0.002             | 0.5               | 9.52               | 0.15     | 0.78     |                                     |                     |    |              |               |              |               |         |         |      |        |        |       |                     |   |              |               |                                     |                     |   |              |               |              |               |         |         |      |        |        |       |                     |   |              |               |                |                     |   |              |               |              |               |         |         |      |        |        |       |                     |   |              |               |                |                     |   |              |               |              |               |         |         |      |        |        |       |                     |   |              |               |                |                     |   |              |               |              |               |         |         |      |        |        |       |                     |   |              |               |                |                     |   |              |             |              |               |        |        |      |       |       |       |                     |   |              |               |               |                     |   |             |             |              |               |        |        |      |       |       |      |                     |   |              |               |              |                     |   |             |             |             |             |       |       |      |       |       |      |                     |   |            |             |       |                     |   |           |           |           |           |       |       |      |       |       |      |                     |   |           |           |       |                     |   |           |           |           |           |       |       |     |       |       |      |                     |   |           |           |       |                    |   |           |

|             |                     |    |               |               |              |              |         |         |      |       |       |       |
|-------------|---------------------|----|---------------|---------------|--------------|--------------|---------|---------|------|-------|-------|-------|
|             | PE (Interval_1_28)  | .7 | 0.48±0.02     | 0.46-0.50     |              |              |         |         |      |       |       |       |
| Nodes       | PA                  | .7 | 26.00±1.73*   | 24.00-27.00   | 17.16±2.34   | 12.00-28.00  | 4.25    | 1.24    | 0.77 | 12.01 | 1.10  | 2.63  |
|             | PE                  | .7 | 15.67±0.58    | 15.00-16.00   |              |              |         |         |      |       |       |       |
| DTA         | PA                  | .7 | 51.00±3.61*   | 47.00-54.00   | 44.49±4.24   | 37.00-70.00  | 8.67    | 9.30    | 0.48 | 6.62  | 1.19  | 3.46  |
|             | PE                  | 17 | 41.33±2.52    | 39.00-44.00   |              |              |         |         |      |       |       |       |
| HghtFI (mm) | PA                  | .7 | 280.00±28.40* | 250.00-305.00 | 213.30±57.50 | 70.00-380.00 | 2381.00 | 932.00  | 0.72 | 22.88 | 0.25  | -0.21 |
|             | PE                  | 17 | 171.70±2.90   | 170.00-175.00 |              |              |         |         |      |       |       |       |
| FIDiam (mm) | PA                  | 17 | 53.30±2.90    | 50.00-55.00   | 50.90±6.60   | 30.00-75.00  | 21      | 23      | 0.48 | 9     | 0.06  | 0.28  |
|             | PE                  | 17 | 48.30±2.90    | 45.00-50.00   |              |              |         |         |      |       |       |       |
| LLeng (mm)  | PA                  | 17 | 85.00±18.00   | 70.00-105.00  | 113.60±20.10 | 40.00-175.00 | 206     | 200     | 0.51 | 12.63 | 0.25  | 0.11  |
|             | PE                  | .7 | 123.30±2.90   | 120.00-125.00 |              |              |         |         |      |       |       |       |
| LWid (mm)   | PA                  | .7 | 38.30±5.80*   | 35.00-45.00   | 54.50±11.60  | 15.00-150.00 | 63      | 73      | 0.46 | 14.50 | 1.41  | 9.62  |
|             | PE                  | .7 | 66.70±2.90    | 65.00-70.00   |              |              |         |         |      |       |       |       |
| Drate       | PA (Interval_1_14)  | 20 | 0.52±0.08     | 0.43-0.57     | 0.43±0.06    | 0.07-0.64    | 0.001   | 0.003   | 0.25 | 7.35  | -0.56 | 2.66  |
|             | PE (Interval_1_14)  | 20 | 0.48±0.08     | 0.43-0.57     |              |              |         |         |      |       |       |       |
| Drate       | PA (Interval_14_28) | 20 | 0.71±0.07     | 0.64-0.79     | 0.61±0.10    | 0.14-1.00    | 0.005   | 0.005   | 0.5  | 11.59 | 0.16  | 1.24  |
|             | PE (Interval_14_28) | 20 | 0.52±0.04     | 0.50-0.57     |              |              |         |         |      |       |       |       |
| Drate       | PA (Interval_1_28)  | 20 | 0.62±0.07     | 0.54-0.68     | 0.52±0.06    | 0.25-0.75    | 0.002   | 0.002   | 0.5  | 8.60  | 0.10  | 1.96  |
|             | PE (Interval_1_28)  | 20 | 0.50±0.04     | 0.46-0.54     |              |              |         |         |      |       |       |       |
| Nodes       | PA                  | 20 | 25.00±1.03    | 25.00-26.00   | 17.33±2.62   | 13.00-30.00  | 5.38    | 1.48    | 0.78 | 13.38 | 1.08  | 2.29  |
|             | PE                  | 20 | 15.67±1.16    | 15.00-17.00   |              |              |         |         |      |       |       |       |
| DTA         | PA                  | 20 | 45.33±1.53**  | 44.00-47.00   | 39.55±4.40   | 31.00-62.00  | 11.72   | 7.67    | 0.60 | 8.66  | 0.93  | 1.37  |
|             | PE                  | 20 | 35.33±1.53    | 34.00-37.00   |              |              |         |         |      |       |       |       |
| HghtFI (mm) | PA                  | 20 | 243.30±20.80* | 220.00-260.00 | 207.20±59.00 | 35.00-390.00 | 2425.00 | 1068.00 | 0.69 | 23.77 | 0.43  | 0.06  |
|             | PE                  | 20 | 125.00±5.00   | 120.00-130.00 |              |              |         |         |      |       |       |       |
| FIDiam (mm) | PA                  | 20 | 50.00±5.00    | 45.00-55.00   | 48.20±6.60   | 35.00-70.00  | 20.00   | 23      | 0.47 | 9.28  | 0.49  | 0.16  |
|             | PE                  | 20 | 40.00±0.00    | 40.00-40.00   |              |              |         |         |      |       |       |       |
| LLeng (mm)  | PA                  | 20 | 83.30±24.70   | 55.00-100.00  | 119.40±23.10 | 35.00-195.00 | 270.00  | 264     | 0.51 | 13.76 | 0.12  | 0.24  |

|              |    |    |              |               |             |             |       |       |      |       |      |      |
|--------------|----|----|--------------|---------------|-------------|-------------|-------|-------|------|-------|------|------|
|              | PE | 20 | 130.00±10.00 | 110.00-130.00 |             |             |       |       |      |       |      |      |
| LWid<br>(mm) | PA | 20 | 33.30±11.60  | 20.00-40.00   | 56.90±12.40 | 20.00-95.00 | 91.00 | 62.00 | 0.59 | 16.77 | 0.32 | 0.01 |
|              | PE | 20 | 65.00±5.80   | 55.00-65.00   |             |             |       |       |      |       |      |      |

---

\*Significant between parents at 95% confidence level

\*\*The standard error of difference is 0, t test cannot be computed

\*\*\*restricted maximum likelihood



**Supplementary Table S2.** Descriptive statistics for traits analyzed in the *P. integrifolia* × *P. axillaris* (IA) RIL population and their parents.

| Trait                            | Parent | Temp (°C) | $\bar{x} \pm (SD)$ | Range         | $\bar{x} \pm (SD)$ | Range        | [V <sub>G</sub> ] | [V <sub>E</sub> ] | [H <sup>2</sup> ] | [CV <sub>G</sub> ] | Skewness | Kurtosis |
|----------------------------------|--------|-----------|--------------------|---------------|--------------------|--------------|-------------------|-------------------|-------------------|--------------------|----------|----------|
| Parents                          |        |           |                    |               | RIL population     |              |                   |                   |                   |                    |          |          |
| Drate (nodes day <sup>-1</sup> ) | PA     | 14        | 0.36±0.04*         | 0.32-0.39     | 0.31±0.08          | 0.04-0.57    | 0.003             | 0.003             | 0.5               | 17.67              | -0.3     | 1.05     |
|                                  | PI     | 14        | 0.25               | 0.25-0.25     |                    |              |                   |                   |                   |                    |          |          |
| DTA                              | PA     | 14        | 81.33±5.03*        | 76.00-86.00   | 94.86±10.37        | 76.00-140.00 | 72.52             | 35.55             | 0.67              | 8.98               | 1.18     | 2.51     |
|                                  | PI     | 14        | 101.00±2.83        | 99.00-103.00  |                    |              |                   |                   |                   |                    |          |          |
| Nodes                            | PA     | 14        | 27.00±3.61         | 23.00-30.00   | 24.03±4.57         | 10.00-36.00  | 10.15             | 10.84             | 0.48              | 13.26              | -0.27    | 1.00     |
|                                  | PI     | 14        | -                  | -             |                    |              |                   |                   |                   |                    |          |          |
| NBL                              | PA     | 14        | -                  | -             | 3.45±1.51          | 1.00-11.00   | -0.11             | 2.38              | ***               | ***                | 1.27     | 3.91     |
|                                  | PI     | 14        | 1.00               | 1.00-1.00     |                    |              |                   |                   |                   |                    |          |          |
| NodesLB                          | PA     | 14        | -                  | -             | 17.71±4.76         | 9.00-40.00   | 15.00             | 7.81              | 0.66              | 21.87              | 1.37     | 2.94     |
|                                  | PI     | 14        | 14.5±3.54          | 12.00-17.00   |                    |              |                   |                   |                   |                    |          |          |
| LNMS                             | PA     | 14        | -                  | -             | 28.45±5.74         | 13.00-43.00  | 11.05             | 21.96             | 0.33              | 11.68              | 0.30     | 0.48     |
|                                  | PI     | 14        | 23.00±2.83         | 21.00-25.00   |                    |              |                   |                   |                   |                    |          |          |
| Branch                           | PA     | 14        | 12.67±0.58         | 12.00-13.00   | 12.18±3.52         | 1.00-25.00   | 6.71              | 5.69              | 0.54              | 21.27              | 0.58     | 2.57     |
|                                  | PI     | 14        | 8.00±1.41          | 7.00-9.00     |                    |              |                   |                   |                   |                    |          |          |
| Height (mm)                      | PA     | 14        | 254.00±34.51       | 220.00-289.00 | 237.29.09±69.59    | 72.00-450.00 | 2934.61           | 1947.74           | 0.47              | 22.83              | 0.13     | 0.10     |
|                                  | PI     | 14        | -                  | -             |                    |              |                   |                   |                   |                    |          |          |
| HMS (mm)                         | PA     | 14        | -                  | -             | 143.56±67.70       | 22.00-380.00 | 3263.15           | 1349.58           | 0.60              | 39.79              | 0.86     | 0.86     |
|                                  | PI     | 14        | 108.5±50.2         | 73.00-144.00  |                    |              |                   |                   |                   |                    |          |          |
| HSB (mm)                         | PA     | 14        | -                  | -             | 156.07±71.35       | 8.00-350.00  | 2319.61           | 2793.04           | 0.45              | 30.86              | 0.52     | -0.06    |
|                                  | PI     | 14        | 129.50±44.55       | 98.00-161.00  |                    |              |                   |                   |                   |                    |          |          |
| FDiam (mm)                       | PA     | 14        | 57.33±28.15        | 31.00-87.00   | 49.91±9.49         | 19.00-73.00  | 54.25             | 36.23             | 0.60              | 14.76              | 0.05     | -0.28    |
|                                  | PI     | 14        | 50.00±11.31        | 42.00-58.00   |                    |              |                   |                   |                   |                    |          |          |
| FIBudPS                          | PA     | 14        | 14.00±5.57         | 9.00_20.00    | 16.51±8.48         | 1.00-50.00   | 26.98             | 45.02             | 0.37              | 31.46              | 0.72     | 0.43     |

|                                  |    |    |              |               |              |              |         |         |      |       |       |       |
|----------------------------------|----|----|--------------|---------------|--------------|--------------|---------|---------|------|-------|-------|-------|
|                                  | PI | 14 | 12.00±1.41   | 11.00-13.00   |              |              |         |         |      |       |       |       |
| FIBud                            | PA | 14 | 90.67±28.89  | 73.00-124.00  | 139.38±77.03 | 10.00-454.00 | 3119.69 | 2833.93 | 0.52 | 40.07 | 1.31  | 2.32  |
|                                  | PI | 14 | 86.00±39.60  | 58.00-114.00  |              |              |         |         |      |       |       |       |
| FIBranchNum                      | PA | 14 | 12.67±0.58*  | 12.00-13.00   | 12.13±3.34   | 1.00-23.00   | 6.23    | 4.95    | 0.56 | 20.58 | -0.04 | 0.82  |
|                                  | PI | 14 | 9.00         | 9.00          |              |              |         |         |      |       |       |       |
| LLeng (mm)                       | PA | 14 | 70.00±8.00   | 29.00-38.00   | 50.74±14.84  | 8.00-118.00  | 92.33   | 128.4   | 0.42 | 18.94 | 0.96  | 2.35  |
|                                  | PI | 14 | 48.00±12.73  | 39.00-57.00   |              |              |         |         |      |       |       |       |
| Lwid (mm)                        | PA | 14 | 33.33±4.51   | 29.00-38.00   | 24.99±8.44   | 4.00-61.00   | 33.38   | 38.07   | 0.47 | 23.12 | 0.86  | 1.39  |
|                                  | PI | 14 | 30.50±12.02  | 22.00-39.00   |              |              |         |         |      |       |       |       |
| Drate (nodes day <sup>-1</sup> ) | PA | 17 | 0.45±0.05    | 0.39-0.50     | 0.37±0.09    | 0.07-0.68    | 0.004   | 0.005   | 0.44 | 17.09 | 0.14  | 1.03  |
|                                  | PI | 17 | 0.32±0.06    | 0.25-0.36     |              |              |         |         |      |       |       |       |
| DTA                              | PA | 17 | 70.00±2.65*  | 68.00-73.00   | 79.63±9.43   | 64.00-139.00 | 48.3    | 40.92   | 0.54 | 8.73  | 2     | 7.79  |
|                                  | PI | 17 | 91.33±1.15   | 90.00-92.00   |              |              |         |         |      |       |       |       |
| Nodes                            | PA | 17 | 24.00±1.00   | 23.00-25.00   | 24.08±4.46   | 10.00-41.00  | 9.17    | 10.75   | 0.46 | 12.58 | 0.54  | 1.81  |
|                                  | PI | 17 | 23.00±0.00   | 23.00-23.00   |              |              |         |         |      |       |       |       |
| NBL                              | PA | 17 | -            | -             | 3.65±1.55    | 1.00-10.00   | 1.54    | 0.89    | 0.63 | 34.00 | 1.18  | 3.83  |
|                                  | PI | 17 | 1.00         | 1.00-1.00     |              |              |         |         |      |       |       |       |
| NoedsLB                          | PA | 17 | -            | -             | 15.45±3.30   | 9.00-23.00   | 5.23    | 5.77    | 0.48 | 14.80 | 0.11  | -0.56 |
|                                  | PI | 17 | 19.00        | 19.00-19.00   |              |              |         |         |      |       |       |       |
| LNMS                             | PA | 17 | -            | -             | 26.94±4.89   | 13.00-40.00  | 7.03    | 16.96   | 0.29 | 9.84  | -0.06 | 0.34  |
|                                  | PI | 17 | 14.00        | 14.00-14.00   |              |              |         |         |      |       |       |       |
| Branch                           | PA | 17 | 11.67±1.53*  | 10.00-13.00   | 11.25±3.20   | 1.00-22.00   | 5.18    | 5.12    | 0.50 | 20.23 | -0.21 | 1.40  |
|                                  | PI | 17 | 8.00±1.00    | 7.00-9.00     |              |              |         |         |      |       |       |       |
| Height (mm)                      | PA | 17 | 247.67±33.86 | 217.00-284.00 | 249.85±80.86 | 58.00-452.00 | 3316.40 | 3246.75 | 0.51 | 23.05 | -0.02 | -0.54 |
|                                  | PI | 17 | 158.50±41.72 | 129.00-188.00 |              |              |         |         |      |       |       |       |
| HMS (mm)                         | PA | 17 | -            | -             | 133.17±57.74 | 20.00-270.00 | 2118.46 | 1248.96 | 0.63 | 34.56 | 0.43  | -0.20 |
|                                  | PI | 17 | 134.00       | 134.00-134.00 |              |              |         |         |      |       |       |       |
| HSB                              | PA | 17 | -            | -             | 134.77±45.40 | 39.00-273.00 | 787.12  | 1287.26 | 0.38 | 20.82 | 0.67  | 0.48  |

|                                        |                        |    |                                     |                         |              |              |         |         |      |       |       |       |
|----------------------------------------|------------------------|----|-------------------------------------|-------------------------|--------------|--------------|---------|---------|------|-------|-------|-------|
| (mm)                                   |                        |    |                                     |                         |              |              |         |         |      |       |       |       |
| FDiam<br>(mm)                          | PI                     | 17 | 256.00                              | 256.00-256.00           |              |              |         |         |      |       |       |       |
|                                        | PA                     | 17 | 56.00±2.65                          | 53.00-58.00             | 49.40±8.98   | 11.00-74.00  | 44.13   | 36.88   | 0.54 | 13.45 | -0.26 | 1.14  |
| FIBudPS                                | PI                     | 17 | 52.67±6.66                          | 47.00-60.00             |              |              |         |         |      |       |       |       |
|                                        | PA                     | 17 | 14.33±5.03                          | 9.00-19.00              | 19.87±9.45   | 3.00-91.00   | 39.70   | 49.85   | 0.44 | 31.71 | 2.12  | 13.00 |
| FIBud                                  | PI                     | 17 | 23.67±6.51                          | 17.00-30.00             |              |              |         |         |      |       |       |       |
|                                        | PA                     | 17 | 76.33±30.27                         | 44.00-104.00            | 121.96±57.07 | 4.00-322.00  | 1626.45 | 1641.76 | 0.50 | 33.07 | 0.74  | 0.84  |
| FIBranchNum                            | PI                     | 17 | 136.33±35.02                        | 96.00-159.00            |              |              |         |         |      |       |       |       |
|                                        | PA                     | 17 | 11.67±1.53*                         | 10.00-13.00             | 11.33±3.19   | 1.00-22.00   | 4.92    | 5.29    | 0.48 | 19.58 | -0.18 | 1.42  |
| LLeng<br>(mm)                          | PI                     | 17 | 8.00±1.00                           | 7.00_9.00               |              |              |         |         |      |       |       |       |
|                                        | PA                     | 17 | 66.00±12.29                         | 52.00-75.00             | 57.98±17.42  | 18.00-158.00 | 107.71  | 196.31  | 0.35 | 17.90 | 1.57  | 5.53  |
| LWid<br>(mm)                           | PI                     | 17 | 44.33±7.02                          | 37.00-51.00             |              |              |         |         |      |       |       |       |
|                                        | PA                     | 17 | 34.00±7.00                          | 26.00-39.00             | 28.63±9.92   | 5.00-74.00   | 56.52   | 42.25   | 0.57 | 26.26 | 1.06  | 2.10  |
| Drate<br>(nodes<br>day <sup>-1</sup> ) | PI                     | 17 | 26.67±2.31                          | 24.00-28.00             |              |              |         |         |      |       |       |       |
|                                        | PA                     | 20 | 0.48±0.03                           | 0.46-0.50               | 0.50±0.11    | 0.14-0.89    | 0.006   | 0.005   | 0.55 | 15.49 | 0.24  | 0.85  |
| DTA                                    | PI                     | 20 | 0.44±0.05                           | 0.39-0.50               |              |              |         |         |      |       |       |       |
|                                        | PA                     | 20 | 68.00±4.24*                         | 65.00-71.00             | 68.56±8.11   | 36.00-128.00 | 29.95   | 35.94   | 0.45 | 7.98  | 1.77  | 11.89 |
| Nodes                                  | PI                     | 20 | 86.67±3.06                          | 84.00-90.00             |              |              |         |         |      |       |       |       |
|                                        | PA (not<br>comparable) | 20 | 29.00**<br>25.00(only<br>one plant) | 29.00<br>only one plant | 24.83±4.19   | 10.00-38.00  | 9.26    | 8.34    | 0.52 | 12.26 | 0.13  | 0.54  |
| NBL                                    | PI                     | 20 | -                                   | -                       |              |              |         |         |      |       |       |       |
|                                        | PA                     | 20 | -                                   | -                       | 2.96±1.00    | 1.00-7.00    | 0.44    | 0.57    | 0.44 | 22.41 | 1.41  | 3.89  |
| NodesLB                                | PI                     | 20 | 3.00±1.41                           | 2.00-4.00               |              |              |         |         |      |       |       |       |
|                                        | PA                     | 20 | -                                   | -                       | 14.75±3.71   | 10.00-30.00  | 7.31    | 6.61    | 0.53 | 18.33 | 1.48  | 3.87  |
| LNMS                                   | PI                     | 20 | 15.00±2.83                          | 13.00-17.00             |              |              |         |         |      |       |       |       |
|                                        | PA                     | 20 | -                                   | -                       | 26.82±3.86   | 20.00-35.00  | 6.41    | 8.59    | 0.43 | 9.44  | 0.13  | -0.56 |
| Branch                                 | PI                     | 20 | 23.50±2.13                          | 22.00-25.00             |              |              |         |         |      |       |       |       |
|                                        | PA                     | 20 | 8.50±0.71*                          | 8.00-9.00               | 8.52±2.67    | 1.00-27.00   | 3.46    | 3.71    | 0.48 | 21.83 | 1.29  | 7.70  |

|                |    |    |                           |                |              |              |         |         |      |       |      |       |
|----------------|----|----|---------------------------|----------------|--------------|--------------|---------|---------|------|-------|------|-------|
| Height<br>(mm) | PI | 20 | 6.33±0.58                 | 6.00-7.00      |              |              |         |         |      |       |      |       |
|                | PA | 20 | 206.50±146.3<br>7 **      | 103.00-310.00  | 266.64±90.97 | 50.00-520.00 | 5598.72 | 2714.50 | 0.67 | 28.06 | 0.10 | -0.30 |
| HMS<br>(mm)    | PI | 20 | 195.00(only<br>one plant) | only one plant |              |              |         |         |      |       |      |       |
|                | PA | 20 | -                         | -              | 172.81±68.10 | 28.00-392.00 | 2912.38 | 1789.5  | 0.62 | 31.23 | 0.50 | 0.99  |
| HSB<br>(mm)    | PI | 20 | 191.00±57.98              | 150.00-232.00  |              |              |         |         |      |       |      |       |
|                | PA | 20 | -                         | -              | 184.14±66.86 | 90.00-340.00 | 2784.68 | 1746.61 | 0.61 | 28.66 | 0.56 | -0.58 |
| FDiam<br>(mm)  | PI | 20 | 208.50±33.23              | 185.00-232.00  |              |              |         |         |      |       |      |       |
|                | PA | 20 | 58.00±8.49                | 52.00-64.00    | 47.29±7.85   | 26.00-73.00  | 39.84   | 21.94   | 0.64 | 13.35 | 0.38 | 0.18  |
| FIBudPS        | PI | 20 | 48.67±1.15                | 48.00-50.00    |              |              |         |         |      |       |      |       |
|                | PA | 20 | 21.50±14.85               | 11.00-32.00    | 16.42±7.00   | 2.00-39.00   | 22.75   | 26.37   | 0.46 | 29.05 | 0.49 | 0.07  |
| FIBud          | PI | 20 | 18.67±10.79               | 11.00-31.00    |              |              |         |         |      |       |      |       |
|                | PA | 20 | 81.00±31.11               | 59.00-103.00   | 78.28±44.01  | 3.00-282.00  | 1286.29 | 657.98  | 0.66 | 45.82 | 1.73 | 4.76  |
| FIBranchNum    | PI | 20 | 75.00±22.52               | 49.00-88.00    |              |              |         |         |      |       |      |       |
|                | PA | 20 | 8.50±0.71*                | 8.00-9.00      | 8.48±2.62    | 1.00-22.00   | 3.56    | 3.32    | 0.52 | 22.25 | 0.50 | 2.47  |
| LLeng<br>(mm)  | PI | 20 | 6.33±0.58                 | 6.00-7.00      |              |              |         |         |      |       |      |       |
|                | PA | 20 | 55.50±7.78                | 50.00-61.00    | 58.45±15.98  | 10.00-111.00 | 119.11  | 136.85  | 0.47 | 18.67 | 0.45 | 0.33  |
| LWid<br>(mm)   | PI | 20 | 56.67±3.51                | 53.00-60.00    |              |              |         |         |      |       |      |       |
|                | PA | 20 | 28.00(only<br>one plant)  | only one plant | 29.23±9.71   | 6.00-61.00   | 61.03   | 33.65   | 0.64 | 26.73 | 0.63 | 0.32  |
|                | PI | 20 | 33.00±2.64                | 30.00-35.00    |              |              |         |         |      |       |      |       |

\*Significant between parents at 95% confidence level

\*\*The standard error of difference is 0, t test cannot be computed

\*\*\*restricted maximum likelihood



|               |     |              |   |        |                              |                   |      |      |       |               |     |              |   |        |                             |                   |           |      |        |
|---------------|-----|--------------|---|--------|------------------------------|-------------------|------|------|-------|---------------|-----|--------------|---|--------|-----------------------------|-------------------|-----------|------|--------|
|               |     | 14FD7<br>.1  | 7 | 19.722 | AE_bin319_1                  | 12.479-<br>20.722 | 3.15 | 5.4  | 1.28  |               |     |              |   |        |                             |                   |           |      |        |
| FIDia<br>m_17 | 2.6 | 17FD2<br>.1  | 2 | 23.01  | AE_bin49_8                   | 23.010-<br>23.289 | 3.48 | 5.5  | -1.31 | FIDia<br>m_17 | 2.6 | 17FD2<br>.1* | 2 | 31.055 | IA_bin170_3                 | 30.8-31.055       | 6.08      | 18.7 | -3.76  |
|               |     | 17FD3<br>.1* | 3 | 75.254 | AE_bin178_112                | 75.143-<br>75.254 | 8.39 | 14.3 | 2.05  |               |     | 17FD5<br>.1  | 5 | 5.085  | IA_bin121_9                 | 4.651-5.085       | 2.7       | 7.7  | -2.55  |
|               |     | 17FD4<br>.1  | 4 | 26.142 | AE_bin222_330<br>_313_2      | 26.045-<br>26.142 | 3.80 | 6.0  | 1.35  |               |     |              |   |        |                             |                   |           |      |        |
|               |     | 17FD6<br>.1  | 6 | 32.398 | AE_259_236_4<br>6_42_97_122  | 32.195-<br>32.398 | 4.81 | 7.8  | -1.62 |               |     |              |   |        |                             |                   |           |      |        |
|               |     | 17FD7<br>.1* | 7 | 21.827 | AE_bin316_1                  | 21.563-<br>21.827 | 5.75 | 9.4  | 1.7   |               |     |              |   |        |                             |                   |           |      |        |
| FIDia<br>m_20 | 2.6 | 20FD3<br>.1* | 3 | 75.143 | AE_bin181_35                 | 75.008-<br>75.143 | 7.27 | 14   | 1.99  | FIDia<br>m_20 | 2.7 | 20FD1<br>.1  | 1 | 11.298 | IA_bin406_10<br>_164_1      | 10.867-<br>11.298 | 3.45      | 6.5  | 1.97   |
|               |     | 20FD4<br>.1  | 4 | 19.675 | AE_bin200_2                  | 19.289-<br>20.675 | 4.18 | 7.7  | 1.54  |               |     | 20FD2<br>.1* | 2 | 30.77  | IA_bin171_2                 | 30.487-30.77      | 19.9<br>3 | 53.8 | -5.42  |
|               |     | 20FD6<br>.1* | 6 | 32.544 | AE_bin259_236<br>_46_42_97_1 | 32.462-<br>32.544 | 5.03 | 9.3  | -1.78 |               |     |              |   |        |                             |                   |           |      |        |
| LLeng<br>_14  | 2.7 | 14LL3.<br>1* | 3 | 74.661 | AE_bin159_15                 | 74.482-<br>74.661 | 7.63 | 15.5 | -6.84 | LLeng<br>_14  | 2.7 | 14LL5.<br>1  | 5 | 4.063  | IA_bin119_24                | 4.063-4.348       | 4.51      | 17.2 | -23.73 |
|               |     | 14LL4.<br>1* | 4 | 25.573 | AE_bin221_1                  | 25.451-<br>25.573 | 4.93 | 9.6  | -5.46 |               |     | 14LL5.<br>2  | 5 | 4.651  | IA_bin120_2                 | 4.348-4.561       | 5.46      | 18.9 | 25.79  |
|               |     | 14LL6.<br>1* | 6 | 35.963 | AE_bin251_3                  | 35.755-<br>35.963 | 5.66 | 11.1 | -6.11 |               |     |              |   |        |                             |                   |           |      |        |
| LLeng<br>_17  | 2.6 | 17LL2.<br>1  | 2 | 31.99  | AE_bin4_1                    | 30.381-<br>32.990 | 3.78 | 9.1  | 7.63  | LLeng<br>_17  | 2.7 | 17LL1.<br>1  | 1 | 7.996  | 4177                        | 7-8.996           | 2.76      | 12   | 5.77   |
|               |     | 17LL3.<br>1* | 3 | 76.781 | AE_bin171_14<br>_39_1        | 76.681-<br>76.781 | 4.66 | 11.4 | -5.92 |               |     |              |   |        |                             |                   |           |      |        |
| LLeng<br>_20  | 2.6 | 20LL2.<br>1* | 2 | 20.981 | AE_bin44_4                   | 20.854-<br>20.981 | 6.73 | 12   | 6.81  | LLeng<br>_20  | 2.8 | 20LL6.<br>1* | 6 | 24.024 | IA_bin358_1                 | 23.899-<br>24.024 | 4.16      | 15.5 | 6.15   |
|               |     | 20LL3.<br>1  | 3 | 76.557 | AE_bin166_17                 | 76.509-<br>76.557 | 5.81 | 10.2 | -6.21 |               |     |              |   |        |                             |                   |           |      |        |
|               |     | 20LL6.<br>1  | 6 | 36.335 | AE_bin252_5                  | 35.994-<br>36.335 | 3.75 | 6.4  | -5.22 |               |     |              |   |        |                             |                   |           |      |        |
|               |     | 20LL7.<br>1* | 7 | 32.179 | AE_bin327_49<br>_49_1        | 31.994-<br>32.179 | 5.24 | 9.1  | 5.94  |               |     |              |   |        |                             |                   |           |      |        |
| LWid_<br>_14  | 2.6 | 14LW<br>3.1* | 3 | 75.955 | AE_bin174_55_<br>296_2       | 75.88-75.955      | 14.8 | 35   | -5.37 | LWid_<br>_14  | 2.9 | 14LW<br>1.1  | 1 | 10.867 | IA_bin407_8                 | 10.49-10.867      | 5.56      | 14.2 | 10.46  |
|               |     |              |   |        |                              |                   |      |      |       |               |     | 14LW<br>1.2  | 1 | 11.46  | IA_bin406_10<br>_164_1      | 11.298-11.46      | 3.63      | 8.8  | -8.54  |
|               |     |              |   |        |                              |                   |      |      |       |               |     | 14LW<br>2.1  | 2 | 39.872 | IA_bin191_9                 | 39.039-<br>39.872 | 3.55      | 8.6  | -2.25  |
|               |     |              |   |        |                              |                   |      |      |       |               |     | 14LW<br>5.1  | 5 | 4.348  | IA_bin119_24                | 3.063-4.348       | 3.36      | 8.1  | -2.26  |
| LWid_<br>_17  | 2.6 | 17LW<br>2.1  | 2 | 33.912 | AE_bin2_2                    | 31.990-<br>33.921 | 4.25 | 9.5  | 3.62  | LWid_<br>_17  | 2.7 | 17LW<br>1.1* | 1 | 10.49  | IA_bin403_1                 | 10.05-10.49       | 5.85      | 16.4 | 4.12   |
|               |     | 17LW<br>3.1* | 3 | 76.781 | AE_bin171_14<br>_39_1        | 76.618-<br>76.781 | 7.83 | 18.5 | -4.08 |               |     | 17LW<br>2.1* | 2 | 30.487 | IA_bin172_1                 | 30.13-30.487      | 5.01      | 13.8 | -3.54  |
|               |     |              |   |        |                              |                   |      |      |       |               |     | 17LW<br>5.1  | 5 | 6.654  | IA_bin125_7                 | 5.894-6.654       | 3.11      | 8.2  | -2.82  |
| LWid_<br>_20  | 2.7 | 20LW<br>1.1* | 1 | 13.115 | AE_bin94_2                   | 12.699-<br>13.115 | 4.98 | 8    | -3.11 | LWid_<br>_20  | 2.8 | 20LW<br>1.1  | 1 | 11.753 | IA_bin410_4                 | 11.46-11.753      | 3.03      | 7.9  | 2.92   |
|               |     | 20LW<br>2.1* | 2 | 22.113 | AE_bin52_48                  | 21.798-<br>22.113 | 8.62 | 14.7 | 4.25  |               |     | 20LW<br>2.1* | 2 | 47.344 | IA_bin224_62<br>_288_352_22 | 47.291-<br>47.344 | 6.96      | 19.7 | -3.89  |
|               |     | 20LW<br>3.1* | 3 | 73.553 | AE_bin169_1                  | 73.328-<br>73.553 | 7.06 | 11.7 | -3.77 |               |     | 20LW<br>7.1* | 7 | 16.26  | 31450                       | 15.931-16.26      | 3.39      | 8.9  | 3.59   |



|           |     |             |   |        |                            |               |       |      |        |           |     |            |   |        |                         |               |      |      |        |
|-----------|-----|-------------|---|--------|----------------------------|---------------|-------|------|--------|-----------|-----|------------|---|--------|-------------------------|---------------|------|------|--------|
| HghtFI_14 | 2.6 | 14HTF L1.1* | 1 | 10.534 | AE_bin88_525_28_2          | 10.283-10.534 | 7.85  | 11.9 | 2.03   | Height_14 | 2.9 | 14HG T2.1  | 2 | 31.589 | IA_bin177_5             | 31.055-31.589 | 5.26 | 37.3 | -41.16 |
|           |     | 14HTF L2.1* | 2 | 17.788 | AE_bin28_3                 | 17.473-17.788 | 5.87  | 8.6  | 2.067  |           |     |            |   |        |                         |               |      |      |        |
|           |     | 14HTF L3.1  | 3 | 77.374 | AE_bin167_4                | 77.136-77.374 | 6.77  | 10.1 | -1.858 |           |     |            |   |        |                         |               |      |      |        |
|           |     | 14HTF L4.1* | 4 | 27.839 | AE_bin206_4                | 27.494-27.839 | 6.82  | 10.1 | 1.914  |           |     |            |   |        |                         |               |      |      |        |
|           |     | 14HTF L6.1* | 6 | 32.806 | AE_bin229_236_46_42_97_221 | 32.730-32.806 | 3.54  | 5.0  | 1.373  |           |     |            |   |        |                         |               |      |      |        |
| HghtFI_17 | 2.5 | 17HTF L1.1* | 1 | 11.03  | AE_bin81_41_28_2           | 10.965-11.03  | 5.3   | 5.7  | 1.3    | Height_17 | 2.8 | 17HG T2.1  | 2 | 47.967 | IA_bin238_4             | 47.499-47.967 | 5.54 | 12.5 | -30.12 |
|           |     |             |   |        |                            |               |       |      |        |           |     | 17HG T5.1* | 5 | 7.492  | IA_bin128_1             | 7.153-7.492   | 9.82 | 25   | -47.1  |
|           |     | 17HTF L3.1  | 3 | 23.745 | AE_bin107_2                | 20.69-23.745  | 4.98  | 5.8  | -1.3   |           |     |            |   |        |                         |               |      |      |        |
|           |     | 17HTF L4.1* | 4 | 27.839 | AE_bin206_4                | 27.494-27.839 | 24.09 | 37.7 | 3.359  |           |     |            |   |        |                         |               |      |      |        |
|           |     | 17HTF L6.1* | 6 | 32.544 | AE_b259_236_46_42_97_222   | 32.462-32.544 | 6.29  | 7.5  | 1.549  |           |     |            |   |        |                         |               |      |      |        |
| HghtFI_20 | 2.6 | 20HTF L3.1* | 3 | 66.144 | AE_bin149_6                | 65.848-66.144 | 4.81  | 6.7  | -1.392 | Height_20 | 2.8 | 20HG T2.1* | 2 | 47.344 | IA_bin224_62_288_352_22 | 47.291-47.344 | 5.27 | 15.6 | -36.5  |
|           |     | 20HTF L4.1* | 4 | 27.839 | AE_bin206_4                | 27.494-27.839 | 26.89 | 52.8 | 3.94   |           |     | 20HG T5.1* | 5 | 5.207  | 138                     | 5.085-5.207   | 3.68 | 10.5 | -34.7  |

\*QTL identified in at least two replicates with locations within 5 cM and within 5 cM of the QTL detected using the trait average.



**Table S9.** Summary of QTL for traits unique to the *P. integrifolia* × *P. axillaris* (IA) population.

| Trait          | LOD threshold | QTL               | Chr. | Position (cM) | Nearest Marker     | Support interval (1 LOD) | LOD   | Explained variance (%) | Additive effects |
|----------------|---------------|-------------------|------|---------------|--------------------|--------------------------|-------|------------------------|------------------|
| LNMS_14        | 2.8           | <i>14LNMS5.1*</i> | 5    | 10.168        | IA_bin149_217      | 10.133-10.168            | 4.46  | 24.5                   | 2.35             |
| Branch_14      | 2.8           | <i>14BR1.1*</i>   | 1    | 20.815        | IA_bin3_10         | 19.78-20.815             | 10.48 | 38                     | -2.6             |
| HMS_14         | 2.8           | <i>14HMS2.1</i>   | 2    | 38.639        | IA_bin190_1        | 37.26-38.639             | 5.46  | 19.7                   | -31.81           |
|                |               | <i>14HMS5.1</i>   | 5    | 7.755         | IA_bin126_11_526_2 | 7.492-7.755              | 3.66  | 12.4                   | -24.2            |
| HSB_14         | 2.8           | <i>14HSB5.1</i>   | 5    | 5.894         | IA_bin123_2        | 5.521-5.894              | 6.26  | 32.6                   | -36              |
| FIBudPS_14     | 2.6           | <i>14FBP6.1*</i>  | 6    | 7.06          | IA_bin309_5        | 15.655                   | 7.06  | 23.6                   | 18.77            |
|                |               | <i>14FBP6.2*</i>  | 6    | 16.035        | IA_bin311_5        | 16.035                   | 9.12  | 32                     | -21.97           |
| FIBud_14       | 2.8           | <i>14FB1.1</i>    | 1    | 34.171        | IA_bin100_5        | 33.44-34.171             | 4.45  | 13.6                   | -31.61           |
|                |               | <i>14FB2.1</i>    | 2    | 29            | IA_bin166_3        | 28.743-29                | 8.08  | 27                     | 39.78            |
|                |               | <i>14FB6.1</i>    | 6    | 9.202         | IA_bin289_1        | 9.054-9.202              | 3.88  | 11.7                   | -27.52           |
| FIBranchNum_14 | 2.8           | <i>14FBN1.1*</i>  | 1    | 21.144        | IA_bin4_2          | 20.815-21.144            | 10.99 | 39.4                   | -2.63            |
| LNMS_17        | 2.8           | <i>17LNMS5.1</i>  | 5    | 11.262        | IA_bin142_1        | 11.04-11.262             | 3.14  | 31.6                   | 2.47             |
| Branch_17      | 2.7           | <i>17BR1.1*</i>   | 1    | 21.799        | IA_bin5_8          | 21.144-21.799            | 5.12  | 21.2                   | -1.89            |
| HSB_17         | 2.8           | <i>17HSB5.1</i>   | 5    | 4.348         | IA_bin119_24       | 3.063-4.348              | 3.66  | 37.4                   | -29.1            |
| FIBudPS_17     | 2.8           | <i>17FBP3_1.1</i> | 3_1  | 18.276        | IA_bin389_21_36_2  | 17.115-18.276            | 3.84  | 12.5                   | 3.71             |
|                |               | <i>17FBP6.1</i>   | 6    | 10.176        | 269/270            | 10.176                   | 5.78  | 19.7                   | -3.71            |
| FIBranchNum_17 | 2.7           | <i>17FBN1.1*</i>  | 1    | 21.799        | IA_bin5_8          | 21.144-21.799            | 4.69  | 19.6                   | -1.84            |
| Branch_20      | 2.7           | <i>20BR1.1</i>    | 1    | 19.283        | 11489              | 18.27-19.283             | 7.07  | 24.9                   | -1.49            |
| HMS_20         | 2.9           | <i>20HMS2.1</i>   | 2    | 33.959        | IA_bin179_2        | 33.796-33.959            | 3.12  | 23.8                   | -45.51           |
|                |               | <i>20HMS4.1</i>   | 4    | 6.146         | IA_bin276_1        | 5.875-6.146              | 4.13  | 34.1                   | -47.1            |
| HSB_20         | 3             | <i>20HSB2.1</i>   | 2    | 30.487        | IA_bin172_1        | 30.13-30.487             | 3.16  | 36.6                   | -52.8            |
| FIBudPS_20     | 2.7           | <i>20FBP2.1</i>   | 2    | 16.411        | IA_bin394_2        | 15.653-16.411            | 3.09  | 11.4                   | 2.09             |
|                |               | <i>20FBP6.1</i>   | 6    | 15.073        | IA_bin307_5        | 14.804-15.073            | 3.6   | 13.5                   | -2.4             |
| FIBud_20       | 2.7           | <i>20FB5.1</i>    | 5    | 8.274         | IA_bin130_22_503_2 | 8.183-8.274              | 4.25  | 15.8                   | 16.53            |
| FIBranchNum_20 | 2.6           | <i>20FBN1.1</i>   | 1    | 19.283        | 11489              | 18.27-19.283             | 8.29  | 26.5                   | -1.51            |
|                |               | <i>20FBN3_2.1</i> | 3_2  | 6.376         | IA_bin433_1        | 5.841-6.376              | 3.01  | 8.6                    | 0.74             |

\*QTL identified in at least two replicates with locations within 5 cM and within 5 cM of the QTL detected using the trait average.

**Supplementary Table S10.** Summary table of QTL rich regions ( $\geq 5$  QTL/cM) in both populations

| Population | Chr Number | Region (cM)                    | SNP number* | Percentage of total SNPs on the same chromosome |
|------------|------------|--------------------------------|-------------|-------------------------------------------------|
| AE         | 2          | 22.113-22.995                  | 557         | 45.0%                                           |
|            | 3          | 3.45-4.317                     | 3           | 0.32%                                           |
|            | 4          | 25.022-25.997<br>27.179-27.839 | 296.25      | 34.5%                                           |
| IA         | 6          | 32.195-33.948                  | 602         | 74.7%                                           |
|            | 1          | 18.3-21.8                      | 40          | 5.3%                                            |
|            | 2          | 28.7-34.0                      | 54          | 9.5%                                            |
|            | 5          | 4.1-6.7                        | 46          | 8.7%                                            |

\*The number of SNPs per sub-bin was calculated as the number of total SNPs in the bin divided by the number of sub-bins
